# Supplementary material for: Hollow nanoparticles via stepwise complexation and selective decomplexation of poly(ethylene imine)Electronic supplementary information (ESI) available: synthesis and physico-chemical data for PEO-b-PMAA-(PO3H2)2, (polymer C). See http://www.rsc.org/suppdata/cc/b1/b110786k/
Source: Royal Society of Chemistry journal article supplement (doi:10.1039/b110786k), 2002-02-13
Supplement: b110786k.doc [file b110786k.doc]

# Supplementary data

`Hollow Nanoparticles *via* stepwise Complexation and selective Decomplexation of Poly(ethylene imine)`

**Authors**: Sascha General, Jan Rudloff, and Andreas F. Thünemann

**Synthesis and physico-chemical data for PEO-*b*-PMAA-(PO3H2)2,(polymer C)**

PEO-*b*-PMAA Mn= 3700g/mol

Mn(PEO) = 3000 g/mol

Mn(PMAA) = 700 g/mol

The precursor polymer was supplied from Thomas Goldschmidt AG and was used without further purification. All other chemicals were supplied from Aldrich in reagent grade and used as received.

A 500 ml three-neck round-bottom flask was fitted with a mechanical stirrer, 20 ml dropping funnel and a reflux condenser with a cooling medium which allows cooling down to –10 °C and connected to gas washing flasks filled with NaOH solution to dispose the formed HCl gas. The system was flushed with argon and charged with PEO-*b*-PMAA (50 g, 0.11 mol -COOH groups), phosphorous acid (8.2 g, 0.11 mol) and methanesulfonic acid 80 ml. The mixture was heated to 65 °C until the polymer was dissolved. PCl3 (20ml, 0.232 mol) was added over 30 minutes and the mixture was maintained at 65 °C for 12 hours. The solution was then cooled to room temperature and quenched by adding ice (200 g) under vigorous stirring. The solution was refluxed for another 5 hours. The solution was cooled to 20 °C, neutralised with 50 % NaOH. The solution containing the raw product was cleaned by exhaustive ultrafiltration in pure water using Millipore membranes with a molecular weight cut off of 1000 g/mol. After freeze drying of the aqueous polymer solutions, the degree of phosphonation was determined with quantitative 31P-NMR-spectroscopy by comparing the signals of an internal standard (KH2PO4 signal at 3.1 ppm) with the signal of the polymer product (18.6 ppm) in D2O. A degree of bisphosphonation of ~16 % was obtained.

Virtually quantitative yields of polymer were obtained after the cleaning process.

Ref.: G.R. Kieczykowski, R.B. Jobson, D.G. Melillo, D.F. Reinhold, V.J. Grenda, I. Shinkai: J. Org. Chem. 1995, 60, 8310-8312.

31P-NMR-Spectrum: 18.6 ppm Signal of the bisphosphonated product, 3.2 ppm Signal of the internal standard KH2PO4.
